# Supplementary material for: Structural effects on sigmatropic shifts in heteroaromatic allyl ethersElectronic supplementary information (ESI) available: selected crystal data for compound 7. See http://www.rsc.org/suppdata/p1/b1/b102674g/
Source: Royal Society of Chemistry journal article supplement (doi:10.1039/b102674g), 2002-04-09
Supplement: b102674g.doc [file b102674g.doc]

**Supplementary data**

**Experimental data for the X-ray diffraction studies on crystalline compound 7a**

| Formula | C19H19NO3S |
| --- | --- |
| Formula weight | 317.43 |
| Crystal system | Monoclinic P21 |
| Cell parameters at 213 K |  |
| *a*/Å | 7.890(2) |
| *b*/Å | 8.6287(18) |
| *c*/Å | 11.953(4) |
| **/Degree | 90 |
| **/Degree | 10.93(4) |
| **/Degree | 90 |
| Volume/Å3 | 796.1(4) |
| Z, calculated density/mg m-3 | 2, 1.324 |
| Linear absorption coefficient/mm-1 | 0.171 |
| F(0000) | 336 |
| range/Degree | 2.64 to 26.06 |
| Reflections collected, unique | 8974, 2989 [R(int) = 0.0409] |
| Completeness to 2 | 95.6% |
| Refinement method | Full-matrix least-squares on F2 |
| Data, restraints, parameters | 2989, 1, 275 |
| Goodness of fit on F2 | 1.101 |
| Final R indeces [I > 2 (I)] | R1 = 0.0268, wR2 = 0.0701 |
| R indeces | R1 = 0.0280, wR2 = 0.0721 |
| Absolute structure parameter | -0.03(5) |
| Largest diffraction peak, hole/e Ă3 | 0.264, -0.336 |

*a* SHELXL 97: Program for the Refinement of Crystal Structures, Universitat of Göttingen, 1997

**Selected structural data for compound 7(Å,º)**

| S1-N1 | 1.6693(14) | C6-C1-C2 | | 122.43(16) | |
| --- | --- | --- | --- | --- | --- |
| S1-C1 | 1.7584(17) | C6-C1-S1 | | 110.30(13) | |
| C6-C1 | 1.379(2) | C2-C1-S1 | | 127.17(14) | |
| C6-C7 | 1.499(3) | C17-C9-C8 | | 122.22(14) | |
| C11-C12 | 1.547(3) | C17-C9-C10 | | 117.67(14) | |
| C9-C17 | 1.326(2) | C8-C9-C10 | | 120.08(13) | |
| C9-C8 | 1.506(2) | C9-C17-C13 | | 119.31(15) | |
| N1-C7 | 1.3881(19) | C7-N1-C8 | | 123.15(14) | |
| N1-C8 | 1.472(2) | C7-N1-S1 | | 114.99(11) | |
| C7-O3 | 1.204(2) | C8-N1-S1 | | 121.28(10) | |
| N1-S1-C1 | 92.87(7) | O3-C7-N1 | | 123.90(16) | |
| C1-C6-C5 | 120.65(18) | O3-C7-C6 | | 127.15(14) | |
| C1-C6-C7 | 112.77(13) | N1-C7-C6 | | 108.94(13) | |
| C5-C6-C7 | 126.55(16) | N1-C8-C9 | | 112.68(13) | |
| C7-C6-C1-C2 | | | -177.50(14) | |  |
| C5-C6-C1-S1 | | | 176.99(12) | |  |
| C7-C6-C1-S1 | | | -0.88(14) | |  |
| N1-S1-C1-C6 | | | -1.16(11) | |  |
| N1-S1-C1-C2 | | | 175.26(15) | |  |
| C8-C9-C17-C13 | | | -175.68(18) | |  |
| C10-C9-C17-C13 | | | 2.7(3) | |  |
| C1-S1-N1-C7 | | | 3.10(11) | |  |
| C1-S1-N1-C8 | | | 174.63(11) | |  |
| C8-N1-C7-O3 | | | 5.3(2) | |  |
| S1-N1-C7-O3 | | | 176.69(12) | |  |
| C8-N1-C7-C6 | | | -175.33(12) | |  |
| S1-N1-C7-C6 | | | -3.97(14) | |  |
| C1-C6-C7-O3 | | | -177.67(15) | |  |
| C5-C6-C7-N1 | | | -174.70(14) | |  |
| C7-N1-C8-C9 | | | -114.79(15) | |  |
| C17-C9-C8-N1 | | | -127.77(17) | |  |

Transitions structures TS1-TS4 were calculated assuming the less hindered conformation leading to the [3,3]-transition state. The scheme below shows 4 possible modes of approach of the reactive parts of the molecule (represented as red bold bonds). It is obvious that conformations III and IV, resembling a boat-like transition structure would bring too much steric hindrance.

I II III IV

From the drawings of conformations I and II, they seem to be equally favourable. However, models of these conformations indicate clearly that conformation II is less favourable.

A (conformation I) B (conformation II)


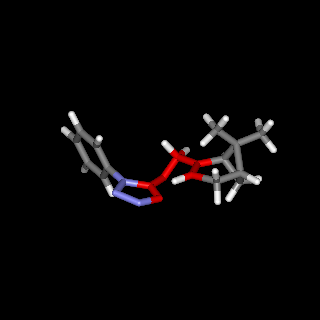

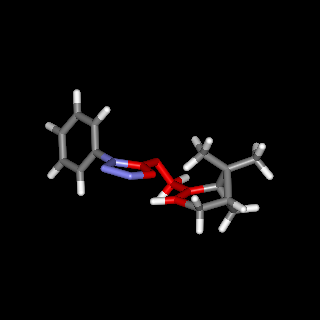


Models conformations I and II in the tetrazolyl derivative.

From these models it can be seen that in conformation I the methyl group is further apart from the tetrazolyl ring, therefore avoiding the steric hindrance, which is clearly present in conformation II. This explanation is now included in the manuscript.

The above qualitative interpretation is confirmed by the PM3 computational studies. The transition structure leading to the other diastereoisomer, resulting from the mode of approach in conformation II has indeed higher energy. The other modes of approach (III and IV) of the double bond of the myrtenyl system to the C=N bond of the heteroaromatic ring, to give a boat-like transition structure, would clearly be highly energetic since it would be almost impossible to approach the reacting centres enough due to the size of the methylene bridge or the two methyl groups on the myrtenyl system (we have not been able to calculate boat-like transition structures).

The size of the SO2 group may have an effect in promoting the 1,3-shift rather than a 3,3-shift: The figure bellow shows the transition structure for the 3,3-shift, evidencing the size of the SO2 group comparatively to the rest of the molecule (including the myrtenyl system). From the top view (A), and considering the hydrogen atoms, which have been omitted, the proximity of the oxygen atom in the SO2 and the myrtenyl group is clear.

A (top view) B (side view)


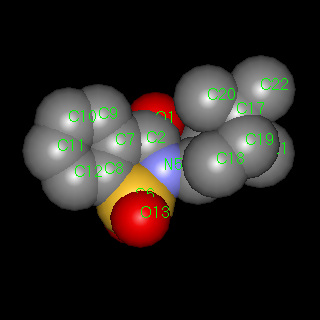

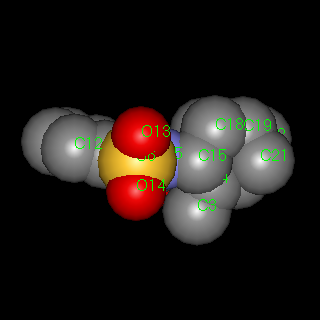


Top (A) and side (B) views of transition structure TS1

On the other hand, considering the [1,3]-rearrangement, occurring through TS2, it is evident that the bulky SO2 group is far apart from the myrtenyl system and therefore there is no sterical hindrance.

A (top view) B (side view)


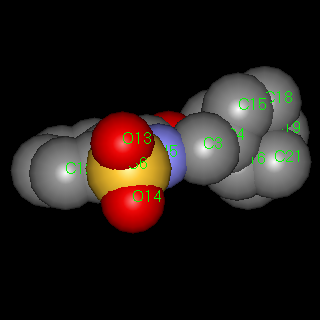

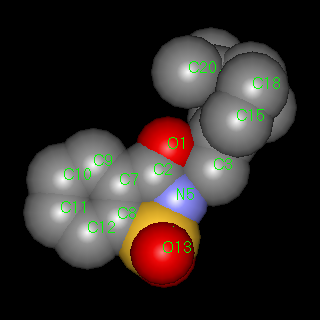


Top (A) and side (B) views of transition structure TS2
